# Supplementary material
Source: PubMed Central journal article supplement (PMC8720111)
Supplement: NIHMS1725602-supplement-Supplemental_Material.pdf [file NIHMS1725602-supplement-Supplemental_Material.pdf]

**Table S1**

*Indirect Effects and Total Effects of Partner Acceptance on Relation Satisfaction Through Felt Acceptance, Replicated with Listwise Deletion*

| Effect                        | Path                                              | Estimate | 95% CI       | % Total Effect |
|-------------------------------|---------------------------------------------------|----------|--------------|----------------|
| Wife's actor effect           |                                                   |          |              |                |
| Total effect                  |                                                   | 0.593    | 0.491, 0.690 |                |
| Total IE                      |                                                   | 0.195    | 0.129, 0.266 | 32.9           |
| Actor-actor IE <sup>a</sup>   | PA <sub>W</sub> →FA <sub>W</sub> →RS <sub>W</sub> | 0.141    | 0.090, 0.199 | 23.8           |
| Partner-Partner IE            | PA <sub>W</sub> →FA <sub>H</sub> →RS <sub>W</sub> | 0.054    | 0.026, 0.086 | 9.1            |
| Husband's actor effect        |                                                   |          |              |                |
| Total effect                  |                                                   | 0.541    | 0.402, 0.670 |                |
| Total IE                      |                                                   | 0.280    | 0.201, 0.363 | 51.8           |
| Actor-actor IE <sup>a</sup>   | PA <sub>H</sub> →FA <sub>H</sub> →RS <sub>H</sub> | 0.226    | 0.160, 0.297 | 41.8           |
| Partner-Partner IE            | PA <sub>H</sub> →FA <sub>W</sub> →RS <sub>H</sub> | 0.054    | 0.026, 0.086 | 10.0           |
| Wife's partner effect         |                                                   |          |              |                |
| Total effect                  |                                                   | 0.222    | 0.147, 0.299 |                |
| Total IE                      |                                                   | 0.222    | 0.147, 0.299 | 100.0          |
| Actor-partner IE              | PA <sub>H</sub> →FA <sub>H</sub> →RS <sub>W</sub> | 0.101    | 0.050, 0.156 | 45.5           |
| Partner-actor IE <sup>b</sup> | PA <sub>H</sub> →FA <sub>W</sub> →RS <sub>W</sub> | 0.121    | 0.076, 0.172 | 54.5           |
| Husband's partner effect      |                                                   |          |              |                |
| Total effect                  |                                                   | 0.184    | 0.121, 0.251 |                |
| Total IE                      |                                                   | 0.184    | 0.121, 0.251 | 100.0          |
| Actor-partner IE              | PA <sub>W</sub> →FA <sub>W</sub> →RS <sub>H</sub> | 0.063    | 0.029, 0.101 | 34.2           |
| Partner-actor IE <sup>b</sup> | PA <sub>W</sub> →FA <sub>H</sub> →RS <sub>H</sub> | 0.121    | 0.076, 0.172 | 65.8           |

*Note.* IE = indirect effect; CI = confidence interval; PA = partner acceptance, or acceptance of

one's partner; FA = felt acceptance; RS = relationship satisfaction, w = wife's, h = husband's.

<sup>a</sup> "projection effect." <sup>b</sup> "accuracy effect."

**Figure S1**

*Final Model Relating Husbands' and Wives' Partner Acceptance, Felt Acceptance, and Relationship Satisfaction, Replicated with Listwise Deletion*

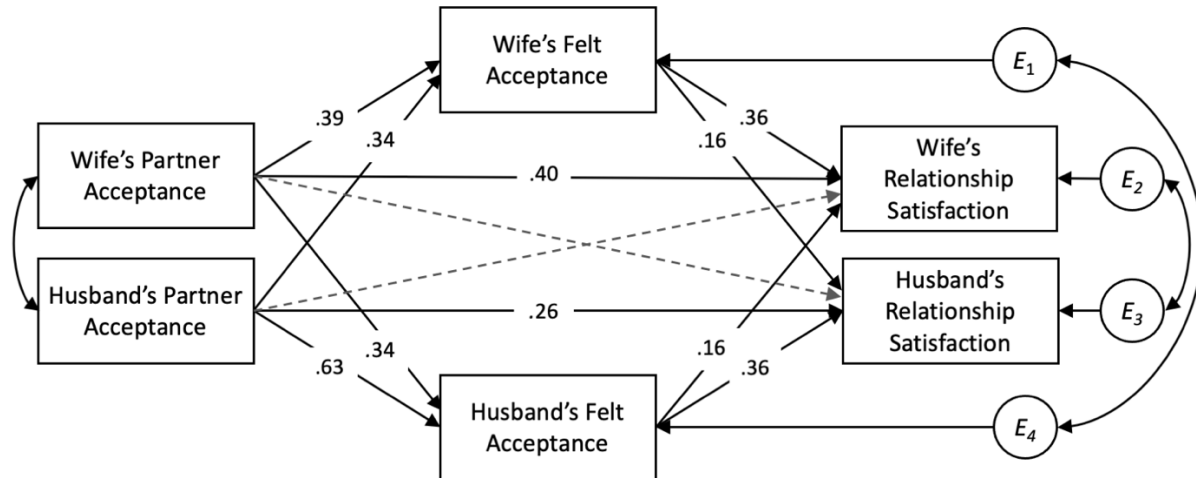

*Note.* Dotted lines represent paths that have been constrained to be zero.
